# Supplementary material
Source: ML conference proceedings conference paper supplement (https://openaccess.thecvf.com/content/CVPR2024/html/Zhu_Learning_to_Transform_CVPR_2024_paper.html)
Supplement: Supplementary file 1 [file Zhu_Learning_to_Transform_CVPR_2024_supplemental.pdf]

# Appendix

## A. Experiments Settings

### A.1. Baseline methods

- **TIM:** TIM adopts a translation operation that shifts the benign example by  $i$  and  $i$  pixels along the two dimensions, respectively. TIM uses a kernel matrix in gradient calculation to replace the translation. In our experiments, we chose the Gaussian kernel as  $\tilde{W}_{i,j} = \frac{1}{2\pi\sigma^2} \exp\left(-\frac{i^2+j^2}{2\sigma^2}\right)$  and  $W_{i,j} = \frac{\tilde{W}_{i,j}}{\sum_{i,j} \tilde{W}_{i,j}}$ .
- **SIM:** The scale-invariant method (SIM) scales every pixel by a set of levels and uses these scaled images for gradient calculation. In our experiments, we choose the number of scale samples  $m = 5$  and the scale factor  $\gamma_i = 1/2^i$ .
- **Admix:** Admix randomly mixes the benign examples with images from other categories and scales the mixed examples in different scales. We set the scale copies  $m_1 = 5$  and scale factor  $\gamma_i = 1/2^i$  and random sample images  $m_2 = 3$  and mixup strength as 0.2.
- **DEM:** DEM provided an ensemble version of diversity invariant methods, which uses five transformed copies for gradient calculation. In our experiments, we set the diversity list to [340, 380, 420, 460, 500].
- **Masked:** Maskblock separates the images into several blocks and sequentially masks every block in the benign examples. Thus, the number of transformed copies is equal to the number of blocks. We set the number of blocks to 16 in our experiments.
- **IDE:** IDE conducts input dropout on a benign example at different rates and gets multiple transformed examples to form an ensemble attack. In our experiments, we choose the dropout rate to be 0.0, 0.1, 0.2, 0.3, 0.4, and the weight factor as equal.
- **S<sup>2</sup>IM:** S<sup>2</sup>IM provides a frequency domain perspective of input transformation, which utilizes DCT and IDCT techniques in transformation. In our experiments, we set the tuning factor  $\rho = 0.5$  and the standard deviation  $\sigma$  the same with perturbation scale  $\epsilon$  and the number of spectrum transformations  $N = 20$ .
- **BSR:** BSR splits the input image into several blocks and then randomly shuffles and rotates these blocks. In our experiments, we split the image into  $2x2$  blocks with the maximum rotation angle 24% and calculate the gradients on  $N = 20$  transformed images.
- **SIA:** SIA decomposed the images into several blocks and transformed each block with an input transformation choosing from seven transformation candidates<sup>2</sup>. We followed the suggested settings in the paper and chose splitting number  $s = 3$ , number of transformed images for gradient calculation  $N = 20$ .
- **AutoMA:** AutoMA targeted finding a strong model augmentation policy to boost adversarial transferability. Following the setting in the paper, we trained the augmentation policy search network on 1000 images from ImageNet [36] validation set, which does not overlap with the benign example set. We adopt the transformation number  $m = 5$  and set the ten operation types and their corresponding magnitude the same as the original paper.
- **ATTA:** ATTA uses a two-layer network to mimic the transformation function. The benign examples are first passed through this transformation network and then sent for calculating the adversarial perturbations. We use the data from ImageNet [36] training partition to train the transformation network. We trained different transformation networks according to the surrogate models. For the training hyperparameters, we follow the settings from the authors.
- **AITL:** AITL introduces selecting input transformations by different benign examples. AITL trains three networks to predict the input transformations for every image. We adopt the 20 image transformations in the same paper and use the pre-train model weights from the authors to initialize the above networks. We set the number of iterations during optimizing the image transformation feature to 1, the corresponding step size to 15, and the number of image transformation operations to 4.

### A.2. Learning to Transform

We decomposed the existing methods and concluded their input transformation methods. We formulate the transformation candidates in 10 categories.

- **(1) Rotate:** Rotate refers to turning the image around a fixed point, usually its center, by a certain angle. The domain of angle is  $[0, 360]$ . We choose 10 angles from the domain, and the interval between the two angles is identical. Thus, we form 10 operations for the rotate category. The smallest rotation angle is  $36^\circ$ , and the biggest rotation angle is  $360^\circ$ .
- **(2) Scale:** the scale category comes from **SIM**. we form 10 operations in our experiments. Each operation differs in scale

---

<sup>2</sup>Vertical Shift, Horizontal Shift, Vertical Flip, Horizontal Flip, Rotate, Scale, Add noise, Resize, DCT, Dropout

factor  $\gamma = 1/2^i, i \in [1, 2, \dots, 10]$ .

- **(3) Resize:** Resize refers to removing the margin part of examples and resizing the main body of the benign examples. We chose 10 resize rates for our experiments, which are 0.0, 0.1, 0.2, 0.3, 0.4, 0.5, 0.6, 0.7, 0.8, and 0.9 respectively.
- **(4) Pad:** the pad category comes from **DIM**. We choose to pad the benign examples to different sizes where the size of the padded example will be  $[size \times size]$ . We chose 10 different sizes, which are 246.5, 257.6, 268.8, 280.0, 291.2, 302.4, 313.6, 324.8, 336.0, and 347.2.
- **(5) Mask:** The mask category comes from **Masked**, which separates the examples into several blocks and randomly blocks one of the blocks. We control the number of blocks and choose 4, 9, 16, 25, 36, 49, 64, 81, 100, 121 in specific.
- **(6) Translate:** the translated category comes from **TIM**. We shift the benign examples into 10 levels, which are 10pixel, 20pixel, 30pixel, 40pixel, 50pixel, 60pixel, 70pixel, 80pixel, 90pixel, 100pixel, along the x-axis and y-axis.
- **(8) Shuffle:** The shuffle category comes from **BSR**, which separates the examples into several blocks and randomly reorders these blocks. We control the number of blocks and choose 4, 9, 16, 25, 36, 49, 64, 81, 100, 121 in specific.
- **(9) Spectrum:** the spectrum category comes from **S<sup>2</sup>IM**, which adds noise in the spectrum domain of benign examples determined by strength  $\rho$ . We set ten different  $\rho$  as 0.1, 0.2, 0.3, 0.4, 0.5, 0.6, 0.7, 0.8, 0.9, 1.0.
- **(10) Mixup:** the mixup category comes from **Admix**. We choose two mixup strengths, 0.2 and 0.4, and five mixup numbers as 1, 2, 3, 4, 5. Thus, we form 10 operations by combining the two settings.

## B. Numerical Results

**Comparison with advanced methods:** We include detailed results of the comparison with different baselines in Tab. 2, Tab. 3, Tab. 4, Tab. 5, Tab. 7, Tab. 6, Tab. 8, Tab. 9, Tab. 10, Tab. 11. For each table, we choose one model from ten models as the surrogate model and use the adversarial examples to attack all these ten models.

We show the attack success rate on adversarial examples crafted on ten different models corresponding to Fig. 5. Tab. 2 is the detailed results for Fig. 5(a). Tab. 3 is the detailed results for Fig. 5(b). Tab. 6 is the detailed results for Fig. 5(c). Tab. 5 is the detailed results for Fig. 5(d). Tab. 7 is the detailed results for Fig. 5(e). Tab. 4 is the detailed results for Fig. 5(f). Tab. 8 is the detailed results for Fig. 5(g). Tab. 9 is the detailed results for Fig. 5(h). Tab. 11 is the detailed results for Fig. 5(i). Tab. 10 is the detailed results for Fig. 5(j). The effectiveness of each attack varies significantly across different models. The L2T attack shows remarkably high effectiveness across all models, which outperforms all the other methods on all ten models.

**Evaluation on the defense methods and cloud APIs:** We include the detailed results across different defense methods and vision API in Tab. 12 corresponding to Fig. 7. The L2T attack, highlighted in gray, shows exceptionally high success rates across almost all defense methods and APIs, particularly against Bard and GPT-4V.

**Ablation study on the number of iterations:** We include the detailed results on the different iterations in Tab. 13 corresponding to Fig. 9. For most attacks, success rates increase as the number of iterations increases. This indicates that more iterations generally lead to more effective adversarial examples. After a certain number of iterations (around 20-30 for many attacks), the increase in success rate slows down or plateaus. For example, the L2T attack’s success rate increases significantly up to about 30 iterations and then grows more slowly.

**Ablation study on the number of samples:** We include the detailed results on the different iterations in Tab. 15 corresponding to Fig. 8. This suggests that using more samples to generate adversarial examples can lead to more effective attacks.

**Ablation study on the number of operations:** We include the detailed results on the different iterations in Tab. 14 corresponding to Fig. 6. As the number of operations increases, there is a general trend of increasing success rates across most models. However, the increase is not significant after the number of operations exceeds 2.

## C. Examples on attacking the Multi-modal Large Language Models

To show the scalability of L2T, we also conducted experiments on multi-modal large language models (MLLMs). As shown in Fig. 13 Fig. 11, both GPT-4V and Bard can classify the benign example correctly into the “bee-eater”. We use L2T to generate the adversarial examples against ResNet-18. As shown in Fig. 14 Fig. 12, the Bard classified the adversarial example as a crocodile, and GPT-4V classified it as a dragonfly. It shows the vulnerability of MLLMs, posing great challenges in developing robust MLLMs.

Table 2. Attack success rate (%) across ten models on the adversarial examples crafted on ResNet-18 by different attack

| Attack            | Res-18 | Res-101 | NeXt-50 | Dense-121 | Inc-v3 | Inc-v4 | ViT  | PiT  | Visformer | Swin | Average |
|-------------------|--------|---------|---------|-----------|--------|--------|------|------|-----------|------|---------|
| I-FGSM            | 100.0  | 30.3    | 28.5    | 36.2      | 25.9   | 20.6   | 7.2  | 8.9  | 11.6      | 16.8 | 28.6    |
| MI-FGSM           | 100.0  | 66.6    | 71.1    | 77.7      | 54.8   | 50.6   | 18.6 | 25.5 | 35.3      | 42.7 | 54.3    |
| Admix             | 100.0  | 89.6    | 90.5    | 94.6      | 80.3   | 77.3   | 31.8 | 38.5 | 56.0      | 60.4 | 71.9    |
| BSR               | 100.0  | 95.8    | 96.6    | 98.1      | 88.9   | 90.2   | 46.1 | 58.7 | 77.7      | 77.6 | 83.0    |
| DEM               | 100.0  | 95.5    | 95.8    | 98.1      | 92.2   | 90.4   | 46.9 | 45.0 | 67.7      | 64.3 | 79.6    |
| DIM               | 100.0  | 84.6    | 87.8    | 93.6      | 77.6   | 73.3   | 31.1 | 37.7 | 53.1      | 56.8 | 69.6    |
| SIA               | 100.0  | 96.5    | 97.1    | 98.6      | 90.0   | 89.2   | 44.4 | 56.8 | 74.3      | 76.0 | 82.3    |
| IDE               | 99.9   | 66.0    | 68.4    | 75.5      | 56.3   | 51.3   | 18.8 | 23.4 | 34.2      | 40.9 | 53.5    |
| Masked            | 100.0  | 71.6    | 76.2    | 80.5      | 58.7   | 54.7   | 20.1 | 26.1 | 37.4      | 44.4 | 57.0    |
| SIM               | 100.0  | 83.0    | 85.9    | 90.7      | 74.0   | 69.3   | 26.2 | 35.2 | 48.4      | 52.4 | 66.5    |
| S <sup>2</sup> IM | 100.0  | 90.4    | 92.6    | 94.1      | 83.8   | 80.4   | 32.9 | 41.6 | 56.2      | 62.4 | 73.4    |
| TIM               | 100.0  | 58.7    | 67.4    | 72.4      | 52.1   | 48.6   | 18.3 | 17.4 | 26.8      | 34.6 | 49.6    |
| ATTA              | 88.0   | 47.9    | 50.1    | 58.3      | 42.7   | 35.4   | 14.0 | 17.7 | 24.6      | 30.7 | 40.9    |
| AutoMA            | 100    | 93.2    | 95.1    | 97.4      | 86.4   | 87.0   | 41   | 50.7 | 67.7      | 67.8 | 78.6    |
| AITL              | 99.6   | 93.3    | 95.2    | 96.8      | 91.8   | 91.2   | 47.5 | 51.8 | 68.9      | 71.2 | 80.7    |
| L2T (Ours)        | 100.0  | 99.3    | 99.2    | 99.6      | 96.9   | 97.4   | 63.7 | 71.1 | 86.6      | 86.0 | 90.0    |

Table 3. Attack success rate (%) across ten models on the adversarial examples crafted on ResNet-101 by different attack

| Attack            | Res-18 | Res-101 | NeXt-50 | Dense-121 | Inc-v3 | Inc-v4 | ViT  | PiT  | Visformer | Swin | Average |
|-------------------|--------|---------|---------|-----------|--------|--------|------|------|-----------|------|---------|
| I-FGSM            | 36.6   | 100.0   | 35.4    | 33.2      | 25.8   | 20.6   | 8.0  | 10.3 | 13.0      | 16.3 | 29.9    |
| MI-FGSM           | 72.6   | 100.0   | 73.8    | 71.7      | 54.1   | 49.6   | 22.7 | 27.2 | 34.5      | 38.3 | 54.4    |
| Admix             | 94.6   | 100.0   | 94.0    | 94.6      | 82.9   | 78.0   | 38.2 | 46.9 | 57.9      | 60.3 | 74.7    |
| BSR               | 97.4   | 100.0   | 97.9    | 97.8      | 89.2   | 90.9   | 56.4 | 67.4 | 80.6      | 81.1 | 85.9    |
| DEM               | 97.6   | 100.0   | 96.8    | 97.5      | 91.7   | 89.5   | 52.2 | 51.9 | 66.8      | 68.4 | 81.2    |
| DIM               | 86.0   | 99.9    | 89.9    | 89.3      | 75.1   | 74.5   | 38.5 | 45.6 | 56.8      | 57.3 | 71.3    |
| SIA               | 98.1   | 100.0   | 97.9    | 98.0      | 87.8   | 89.4   | 48.9 | 58.9 | 75.0      | 74.3 | 82.8    |
| IDE               | 78.5   | 96.4    | 72.8    | 73.6      | 59.9   | 56.6   | 23.8 | 25.6 | 34.7      | 43.0 | 56.5    |
| Masked            | 80.9   | 100.0   | 80.9    | 80.2      | 58.8   | 54.5   | 25.0 | 30.4 | 40.2      | 43.2 | 59.4    |
| SIM               | 86.8   | 100.0   | 88.0    | 89.2      | 74.9   | 68.7   | 33.1 | 39.1 | 50.1      | 51.7 | 68.2    |
| S <sup>2</sup> IM | 95.9   | 100.0   | 94.8    | 94.7      | 88.3   | 84.3   | 45.7 | 51.7 | 62.3      | 67.1 | 78.5    |
| TIM               | 69.3   | 100.0   | 72.8    | 67.2      | 50.9   | 47.8   | 23.2 | 23.2 | 30.7      | 36.8 | 52.2    |
| ATTA              | 51.7   | 73.1    | 50.7    | 49.6      | 41.2   | 35.8   | 15.9 | 19.8 | 25.4      | 27.8 | 39.9    |
| AutoMA            | 95.5   | 99.7    | 95.4    | 95.2      | 85.6   | 86.1   | 50.5 | 59.8 | 70.3      | 70.9 | 80.9    |
| AITL              | 96.6   | 99.1    | 96.5    | 97.8      | 92.0   | 92.5   | 57.1 | 64.9 | 76.0      | 76.3 | 84.9    |
| L2T (Ours)        | 99.3   | 100.0   | 99.2    | 99.5      | 97.1   | 96.8   | 72.3 | 77.9 | 88.9      | 88.1 | 91.9    |

Table 4. Attack success rate (%) across ten models on the adversarial examples crafted on DenseNet-121 by different attack

| Attack            | Res-18 | Res-101 | NeXt-50 | Dense-121 | Inc-v3 | Inc-v4 | ViT  | PiT  | Visformer | Swin | Average |
|-------------------|--------|---------|---------|-----------|--------|--------|------|------|-----------|------|---------|
| I-FGSM            | 44.5   | 34.0    | 36.6    | 100.0     | 28.6   | 23.9   | 8.1  | 11.3 | 14.7      | 20.8 | 32.2    |
| MI-FGSM           | 78.6   | 68.9    | 74.8    | 100.0     | 56.6   | 53.6   | 24.5 | 31.1 | 44.0      | 45.6 | 57.8    |
| Admix             | 94.3   | 91.1    | 93.4    | 100.0     | 82.5   | 81.1   | 40.8 | 50.7 | 68.3      | 65.8 | 76.8    |
| BSR               | 97.4   | 85.7    | 97.3    | 100.0     | 89.7   | 91.5   | 52.2 | 68.3 | 84.7      | 80.0 | 84.7    |
| DEM               | 97.8   | 94.5    | 97.1    | 100.0     | 92.2   | 91.5   | 53.8 | 56.0 | 74.4      | 70.8 | 82.8    |
| DIM               | 88.4   | 84.1    | 89.7    | 100.0     | 76.4   | 75.5   | 36.5 | 44.0 | 62.0      | 59.5 | 71.6    |
| SIA               | 98.4   | 96.4    | 97.5    | 100.0     | 89.1   | 92.8   | 49.7 | 64.1 | 83.4      | 78.1 | 85.0    |
| IDE               | 87.8   | 77.3    | 80.6    | 99.4      | 70.6   | 68.5   | 26.3 | 35.0 | 49.5      | 51.8 | 64.7    |
| Masked            | 82.8   | 74.0    | 81.2    | 100.0     | 60.6   | 60.8   | 25.7 | 35.7 | 49.3      | 51.3 | 62.1    |
| SIM               | 89.7   | 84.2    | 88.3    | 100.0     | 75.3   | 74.2   | 32.6 | 42.8 | 59.2      | 57.3 | 70.4    |
| S <sup>2</sup> IM | 97.2   | 94.9    | 96.9    | 100.0     | 90.7   | 90.2   | 50.7 | 61.6 | 78.5      | 76.9 | 83.8    |
| TIM               | 74.7   | 62.4    | 70.9    | 100.0     | 52.2   | 51.6   | 20.1 | 21.7 | 33.9      | 38.9 | 52.6    |
| ATTA              | 54.8   | 45.6    | 49.7    | 79.4      | 42.2   | 36.8   | 15.3 | 20.6 | 28.3      | 32.3 | 40.5    |
| AutoMA            | 95.3   | 93.8    | 95.2    | 99.9      | 85.4   | 86.9   | 46.5 | 59.6 | 73.0      | 71.3 | 80.7    |
| AITL              | 97.1   | 94.3    | 96.0    | 99.5      | 91.3   | 92.6   | 53.7 | 61.5 | 76.0      | 74.6 | 83.7    |
| L2T (Ours)        | 99.5   | 98.9    | 99.3    | 100.0     | 97.4   | 98.3   | 71.3 | 79.7 | 92.9      | 90.2 | 92.8    |

Table 5. Attack success rate (%) across ten models on the adversarial examples crafted on ResNeXt-50 by different attack

| Attack            | Res-18 | Res-101 | NeXt-50 | Dense-121 | Inc-v3 | Inc-v4 | ViT  | PiT  | Visformer | Swin | Average |
|-------------------|--------|---------|---------|-----------|--------|--------|------|------|-----------|------|---------|
| I-FGSM            | 32.4   | 29.4    | 99.4    | 31.8      | 25.0   | 18.5   | 7.3  | 9.8  | 13.1      | 15.8 | 28.2    |
| MI-FGSM           | 64.7   | 62.9    | 99.9    | 69.2      | 49.3   | 45.7   | 19.1 | 27.0 | 35.6      | 38.8 | 51.2    |
| Admix             | 88.7   | 87.4    | 100.0   | 94.3      | 78.0   | 73.7   | 33.6 | 44.0 | 58.5      | 57.3 | 71.5    |
| BSR               | 95.8   | 95.7    | 100.0   | 97.5      | 83.3   | 86.9   | 47.9 | 66.8 | 79.5      | 74.5 | 82.8    |
| DEM               | 96.6   | 94.8    | 100.0   | 97.9      | 89.5   | 90.5   | 49.5 | 55.1 | 70.9      | 67.5 | 81.2    |
| DIM               | 81.7   | 80.7    | 99.8    | 85.1      | 67.7   | 69.0   | 33.7 | 42.4 | 53.1      | 54.2 | 66.7    |
| SIA               | 97.0   | 95.1    | 100.0   | 97.2      | 83.5   | 85.8   | 44.6 | 60.6 | 76.9      | 73.7 | 81.4    |
| IDE               | 76.2   | 66.1    | 96.3    | 71.0      | 54.8   | 55.0   | 20.7 | 26.8 | 36.1      | 42.6 | 54.6    |
| Masked            | 74.8   | 70.6    | 100.0   | 76.1      | 52.5   | 50.8   | 22.3 | 31.2 | 41.2      | 43.3 | 56.3    |
| SIM               | 79.3   | 76.9    | 100.0   | 86.3      | 66.2   | 62.2   | 25.9 | 36.6 | 48.0      | 47.5 | 62.9    |
| S <sup>2</sup> IM | 95.5   | 94.3    | 99.9    | 96.6      | 86.2   | 85.3   | 45.5 | 56.3 | 67.3      | 71.4 | 79.8    |
| TIM               | 65.6   | 58.6    | 99.8    | 64.3      | 45.5   | 44.2   | 18.4 | 20.9 | 30.1      | 37.7 | 48.5    |
| ATTA              | 43.1   | 39.8    | 66.9    | 42.9      | 34.3   | 29.9   | 14.0 | 17.5 | 22.9      | 25.1 | 33.6    |
| AutoMA            | 89.6   | 91.0    | 99.7    | 93.4      | 78.4   | 80.8   | 42.3 | 57.7 | 67.7      | 66.9 | 76.8    |
| AITL              | 94.0   | 92.4    | 98.9    | 96.6      | 88.7   | 88.9   | 47.5 | 59.8 | 72.5      | 70.1 | 80.9    |
| L2T (Ours)        | 99.4   | 99.2    | 100.0   | 99.3      | 95.6   | 97.2   | 67.2 | 78.2 | 88.1      | 85.8 | 91.0    |

Table 6. Attack success rate (%) across ten models on the adversarial examples crafted on Inception-v3 by different attack

| Attack            | Res-18 | Res-101 | NeXt-50 | Dense-121 | Inc-v3 | Inc-v4 | ViT  | PiT  | Visformer | Swin | Average |
|-------------------|--------|---------|---------|-----------|--------|--------|------|------|-----------|------|---------|
| I-FGSM            | 19.7   | 13.7    | 14.6    | 16.8      | 98.5   | 21.9   | 6.7  | 7.7  | 8.8       | 13.4 | 22.2    |
| MI-FGSM           | 48.0   | 37.5    | 38.5    | 42.9      | 98.7   | 49.3   | 16.4 | 20.7 | 23.8      | 29.0 | 40.5    |
| Admix             | 66.7   | 57.6    | 58.5    | 67.2      | 99.8   | 76.5   | 23.5 | 28.8 | 34.4      | 41.1 | 55.4    |
| BSR               | 88.4   | 81.9    | 84.3    | 88.2      | 99.8   | 91.7   | 39.3 | 48.4 | 60.8      | 64.0 | 74.7    |
| DEM               | 77.5   | 68.7    | 71.4    | 75.3      | 99.5   | 85.0   | 34.8 | 34.1 | 43.7      | 50.5 | 64.0    |
| DIM               | 59.4   | 48.2    | 51.7    | 57.4      | 99.0   | 66.4   | 21.5 | 24.3 | 31.2      | 37.9 | 49.7    |
| SIA               | 82.9   | 73.0    | 76.0    | 81.6      | 99.3   | 88.2   | 31.9 | 41.4 | 51.7      | 55.6 | 68.2    |
| IDE               | 56.4   | 41.9    | 44.9    | 46.5      | 95.4   | 56.7   | 15.6 | 19.1 | 23.0      | 29.3 | 42.9    |
| Masked            | 55.7   | 45.8    | 45.1    | 50.4      | 100.0  | 58.3   | 17.5 | 22.7 | 27.3      | 32.8 | 45.6    |
| SIM               | 60.2   | 47.7    | 46.8    | 54.1      | 99.8   | 64.2   | 19.6 | 23.7 | 26.4      | 33.1 | 47.6    |
| S <sup>2</sup> IM | 71.5   | 64.5    | 66.1    | 70.7      | 99.6   | 82.7   | 27.6 | 36.4 | 42.1      | 50.2 | 61.1    |
| TIM               | 44.6   | 31.7    | 37.6    | 38.9      | 98.2   | 42.3   | 13.5 | 13.3 | 16.2      | 23.0 | 35.9    |
| ATTA              | 31.0   | 21.0    | 22.1    | 23.8      | 50.9   | 28     | 10.4 | 11.6 | 13.3      | 19.2 | 23.1    |
| AutoMA            | 65.6   | 58.0    | 62.2    | 65.6      | 98.5   | 76.1   | 27.1 | 32.6 | 38.8      | 44.2 | 56.7    |
| AITL              | 77.1   | 69.9    | 72.2    | 79.6      | 98.9   | 85.8   | 34.3 | 38.9 | 46.6      | 53.4 | 65.7    |
| L2T (Ours)        | 89.9   | 86.5    | 88.1    | 91.9      | 99.6   | 94.8   | 48.7 | 54.1 | 65.4      | 69.3 | 78.8    |

Table 7. Attack success rate (%) across ten models on the adversarial examples crafted on Inception-v4 by different attack

| Attack            | Res-18 | Res-101 | NeXt-50 | Dense-121 | Inc-v3 | Inc-v4 | ViT  | PiT  | Visformer | Swin | Average |
|-------------------|--------|---------|---------|-----------|--------|--------|------|------|-----------|------|---------|
| I-FGSM            | 22.4   | 15.0    | 17.3    | 18.4      | 30.5   | 95.7   | 6.3  | 8.6  | 11.4      | 13.9 | 23.9    |
| MI-FGSM           | 50.1   | 41.3    | 43.7    | 47.6      | 58.2   | 97.1   | 17.4 | 21.4 | 28.4      | 31.5 | 43.7    |
| Admix             | 74.9   | 69.0    | 71.7    | 78.6      | 88.2   | 99.7   | 33.3 | 39.4 | 50.6      | 52.8 | 65.8    |
| BSR               | 87.3   | 79.1    | 85.6    | 89.3      | 89.3   | 99.9   | 38.5 | 52.4 | 66.6      | 65.2 | 75.3    |
| DEM               | 79.0   | 71.0    | 76.2    | 79.4      | 87.9   | 99.2   | 35.6 | 37.4 | 52.3      | 52.8 | 67.1    |
| DIM               | 63.0   | 55.4    | 60.4    | 63.8      | 73.2   | 96.8   | 24.7 | 31.5 | 39.6      | 40.8 | 54.9    |
| SIA               | 83.0   | 73.3    | 78.5    | 85.5      | 87.6   | 99.7   | 34.1 | 44.6 | 59.0      | 59.8 | 70.5    |
| IDE               | 56.8   | 45.8    | 48.5    | 54.9      | 64.2   | 92.5   | 17.4 | 23.3 | 28.0      | 33.6 | 46.5    |
| Masked            | 56.0   | 47.7    | 49.3    | 57.3      | 65.2   | 99.7   | 19.9 | 26.1 | 33.9      | 36.5 | 49.2    |
| SIM               | 66.3   | 60.2    | 64.4    | 71.1      | 80.8   | 99.5   | 28.9 | 35.0 | 44.0      | 44.6 | 59.5    |
| S <sup>2</sup> IM | 76.5   | 69.9    | 72.9    | 77.8      | 85.4   | 99.4   | 33.6 | 42.4 | 50.6      | 54.7 | 66.3    |
| TIM               | 46.6   | 35.8    | 41.6    | 44.1      | 50.8   | 96.2   | 13.3 | 14.8 | 19.0      | 24.5 | 38.7    |
| ATTA              | 32.6   | 24.1    | 25.6    | 28.4      | 36.2   | 46.2   | 11.3 | 13.3 | 17.0      | 20.0 | 25.5    |
| AutoMA            | 71.8   | 63.8    | 69.4    | 75.1      | 84.1   | 97.9   | 32   | 39.5 | 50.3      | 49.8 | 63.4    |
| AITL              | 81.1   | 75.3    | 79.4    | 86.1      | 90.8   | 99.3   | 41   | 47.3 | 59.5      | 59.2 | 71.9    |
| L2T (Ours)        | 91.5   | 88.8    | 91.1    | 94.5      | 95.4   | 99.9   | 51.7 | 61.9 | 75.1      | 74.0 | 82.4    |

Table 8. Attack success rate (%) across ten models on the adversarial examples crafted on ViT by different attacks

| Attack            | Res-18 | Res-101 | NeXt-50 | Dense-121 | Inc-v3 | Inc-v4 | ViT  | PiT  | Visformer | Swin | Average |
|-------------------|--------|---------|---------|-----------|--------|--------|------|------|-----------|------|---------|
| I-FGSM            | 26.3   | 19.8    | 21.7    | 23.6      | 23.4   | 20.6   | 99.7 | 20.0 | 20.6      | 33.1 | 30.9    |
| MI-FGSM           | 52.9   | 44.7    | 48.3    | 51.3      | 45.6   | 42.2   | 99.7 | 44.6 | 45.7      | 60.6 | 53.6    |
| Admix             | 64.9   | 59.8    | 61.2    | 64.1      | 62.1   | 57.3   | 99.2 | 60.6 | 62.2      | 74.4 | 66.6    |
| BSR               | 83.6   | 83.8    | 86.2    | 87.8      | 79.9   | 81.8   | 99.7 | 90.3 | 90.4      | 89.6 | 87.3    |
| DEM               | 76.6   | 78.5    | 80.8    | 81.8      | 79.6   | 79.0   | 99.9 | 82.1 | 81.7      | 81.0 | 82.1    |
| DIM               | 63.2   | 60.7    | 62.5    | 65.3      | 61.1   | 59.8   | 98.7 | 66.5 | 64.1      | 71.4 | 67.3    |
| SIA               | 82.0   | 79.9    | 82.0    | 83.4      | 75.2   | 78.1   | 99.7 | 85.4 | 85.8      | 88.4 | 84.0    |
| IDE               | 67.1   | 60.8    | 64.2    | 66.3      | 62.5   | 59.7   | 99.3 | 56.8 | 58.8      | 72.6 | 66.8    |
| Masked            | 55.6   | 47.5    | 50.9    | 54.8      | 49.3   | 44.5   | 99.8 | 49.2 | 49.7      | 65.6 | 56.7    |
| SIM               | 60.8   | 53.0    | 55.6    | 60.8      | 55.1   | 51.7   | 99.3 | 53.7 | 56.4      | 68.4 | 61.5    |
| S <sup>2</sup> IM | 67.8   | 63.2    | 65.6    | 69.4      | 68.3   | 65.5   | 99.9 | 66.7 | 67.3      | 78.3 | 71.2    |
| TIM               | 49.1   | 42.3    | 46.3    | 47.1      | 40.3   | 37.6   | 98.9 | 34.5 | 37.7      | 46.5 | 48.0    |
| ATTA              | 41.9   | 33.6    | 36.1    | 39.3      | 39.3   | 32.9   | 79.8 | 32.7 | 32.6      | 42.0 | 41.0    |
| AutoMA            | 72.1   | 71.0    | 73.0    | 75.8      | 70.9   | 71.4   | 97.9 | 77.9 | 77.6      | 78.6 | 76.6    |
| AITL              | 76.8   | 74.4    | 77.7    | 78.6      | 77.7   | 75.8   | 94.9 | 79.5 | 78.9      | 79.6 | 79.4    |
| L2T (Ours)        | 89.7   | 87.3    | 88.7    | 89.6      | 87.4   | 86.8   | 98.2 | 90.6 | 90.8      | 92.3 | 90.1    |

Table 9. Attack success rate (%) across ten models on the adversarial examples crafted on PiT by different attacks

| Attack            | Res-18 | Res-101 | NeXt-50 | Dense-121 | Inc-v3 | Inc-v4 | ViT  | PiT  | Visformer | Swin | Average |
|-------------------|--------|---------|---------|-----------|--------|--------|------|------|-----------|------|---------|
| I-FGSM            | 22.1   | 15.9    | 18.4    | 19.9      | 23.3   | 17.7   | 11.3 | 85.1 | 21.6      | 24.8 | 26.0    |
| MI-FGSM           | 52.3   | 41.8    | 48.3    | 51.8      | 46.4   | 43.0   | 30.9 | 97.6 | 53.1      | 55.9 | 52.1    |
| Admix             | 63.0   | 55.1    | 61.8    | 63.5      | 57.3   | 56.8   | 46.7 | 97.5 | 67.5      | 70.4 | 64.0    |
| BSR               | 80.9   | 77.6    | 84.0    | 85.0      | 74.7   | 76.8   | 70.9 | 99.2 | 89.5      | 90.0 | 82.9    |
| DEM               | 79.4   | 74.7    | 78.5    | 80.5      | 78.3   | 76.9   | 68.7 | 99.9 | 84.9      | 83.0 | 80.5    |
| DIM               | 63.3   | 58.7    | 64.6    | 64.8      | 61.5   | 62.4   | 50.9 | 94.3 | 70.1      | 71.7 | 66.2    |
| SIA               | 81.3   | 77.2    | 85.6    | 84.9      | 75.8   | 77.3   | 69.7 | 99.0 | 90.6      | 91.6 | 83.3    |
| IDE               | 68.8   | 61.5    | 64.0    | 68.4      | 66.1   | 64.0   | 53.1 | 94.2 | 70.2      | 71.2 | 68.2    |
| Masked            | 59.1   | 51.7    | 57.2    | 59.0      | 53.5   | 49.1   | 39.1 | 99.3 | 61.8      | 63.9 | 59.4    |
| SIM               | 62.0   | 54.2    | 59.9    | 61.6      | 55.7   | 53.6   | 43.6 | 99.2 | 65.1      | 68.5 | 62.3    |
| S <sup>2</sup> IM | 71.6   | 68.9    | 70.9    | 73.8      | 71.7   | 69.9   | 61.2 | 96.4 | 76.1      | 78.3 | 73.9    |
| TIM               | 48.7   | 37.9    | 47.7    | 47.3      | 40.7   | 37.7   | 27.9 | 93.8 | 42.2      | 48.0 | 47.2    |
| ATTA              | 44.4   | 32.1    | 38.1    | 40.3      | 39.7   | 35.4   | 23.7 | 71.6 | 37.6      | 40.2 | 40.3    |
| AutoMA            | 71.1   | 67.9    | 74.8    | 76.2      | 69.8   | 67.5   | 62.8 | 96.6 | 80.4      | 81.2 | 74.8    |
| AITL              | 79.6   | 79.0    | 82.5    | 83.5      | 81.2   | 80.1   | 74.6 | 93.5 | 86.7      | 86.4 | 82.7    |
| L2T (Ours)        | 93.2   | 90.1    | 93.0    | 94.3      | 90.7   | 90.7   | 89.8 | 99.5 | 96.9      | 97.1 | 93.5    |

Table 10. Attack success rate (%) across ten models on the adversarial examples crafted on Visformer by different attacks

| Attack            | Res-18 | Res-101 | NeXt-50 | Dense-121 | Inc-v3 | Inc-v4 | ViT  | PiT  | Visformer | Swin | Average |
|-------------------|--------|---------|---------|-----------|--------|--------|------|------|-----------|------|---------|
| I-FGSM            | 25.4   | 20.9    | 24.4    | 26.6      | 25.4   | 21.4   | 12.0 | 22.4 | 93.3      | 32.6 | 30.2    |
| MI-FGSM           | 59.8   | 50.1    | 55.3    | 60.2      | 50.2   | 50.8   | 34.5 | 54.6 | 98.3      | 64.3 | 57.8    |
| Admix             | 77.1   | 70.0    | 77.4    | 80.0      | 69.4   | 71.0   | 55.4 | 77.3 | 97.8      | 83.7 | 75.9    |
| BSR               | 86.0   | 82.9    | 88.8    | 90.5      | 79.5   | 83.7   | 65.7 | 90.4 | 99.5      | 91.7 | 85.9    |
| DEM               | 84.3   | 81.4    | 86.6    | 87.8      | 83.5   | 85.1   | 65.8 | 83.0 | 99.9      | 85.0 | 84.3    |
| DIM               | 71.9   | 68.5    | 74.9    | 79.1      | 69.2   | 70.5   | 52.2 | 75.1 | 96.8      | 79.5 | 73.8    |
| SIA               | 86.6   | 84.5    | 89.9    | 91.7      | 80.2   | 84.2   | 69.7 | 90.9 | 98.9      | 92.8 | 86.9    |
| IDE               | 77.9   | 71.6    | 75.8    | 79.6      | 73.5   | 73.8   | 57.4 | 73.7 | 97.0      | 81.2 | 76.2    |
| Masked            | 63.5   | 54.3    | 61.4    | 64.6      | 54.7   | 54.6   | 37.1 | 60.0 | 99.2      | 68.5 | 61.8    |
| SIM               | 71.1   | 65.7    | 71.2    | 75.3      | 64.5   | 66.5   | 49.5 | 71.6 | 97.8      | 79.6 | 71.3    |
| S <sup>2</sup> IM | 82.1   | 78.3    | 81.6    | 86.1      | 81.6   | 82.2   | 66.4 | 81.7 | 97.2      | 87.3 | 82.5    |
| TIM               | 57.4   | 47.7    | 56.9    | 58.9      | 46.6   | 47.5   | 33.9 | 48.1 | 97.6      | 60.0 | 55.5    |
| ATTA              | 50.0   | 39.5    | 45.7    | 49.5      | 41.5   | 41.8   | 26.8 | 42.8 | 85.9      | 51.8 | 47.5    |
| AutoMA            | 79.3   | 78.0    | 85.4    | 86.7      | 77.3   | 80.9   | 66.8 | 85.4 | 98.2      | 87.8 | 82.6    |
| AITL              | 87.2   | 85.0    | 88.4    | 89.3      | 84.1   | 87.0   | 76.6 | 88.7 | 96.5      | 90.5 | 87.3    |
| L2T (Ours)        | 96.8   | 95.6    | 97.1    | 97.9      | 94.4   | 96.5   | 89.9 | 96.6 | 100.0     | 97.5 | 96.2    |

Table 11. Attack success rate (%) across ten models on the adversarial examples crafted on Swin by different attacks

| Attack            | Res-18 | Res-101 | NeXt-50 | Dense-121 | Inc-v3 | Inc-v4 | ViT  | PiT  | Visformer | Swin  | Average |
|-------------------|--------|---------|---------|-----------|--------|--------|------|------|-----------|-------|---------|
| I-FGSM            | 14.3   | 10.8    | 9.9     | 13.2      | 17.5   | 11.6   | 5.9  | 8.1  | 10.8      | 72.3  | 17.4    |
| MI-FGSM           | 44.9   | 32.6    | 36.6    | 39.9      | 37.1   | 31.7   | 22.5 | 32.0 | 40.1      | 98.8  | 41.6    |
| Admix             | 56.0   | 41.6    | 47.2    | 51.7      | 45.0   | 41.6   | 31.4 | 43.8 | 53.7      | 99.2  | 51.1    |
| BSR               | 86.9   | 79.1    | 86.3    | 87.3      | 76.4   | 78.6   | 65.6 | 88.8 | 92.0      | 99.3  | 84.0    |
| DEM               | 79.4   | 75.6    | 78.3    | 80.0      | 76.5   | 77.2   | 61.5 | 79.1 | 81.4      | 100.0 | 78.9    |
| DIM               | 70.9   | 64.8    | 70.4    | 72.0      | 66.8   | 67.3   | 52.3 | 73.4 | 76.4      | 98.0  | 71.2    |
| SIA               | 82.7   | 74.5    | 79.3    | 84.2      | 70.5   | 72.1   | 59.3 | 82.5 | 88.7      | 99.1  | 79.3    |
| IDE               | 67.3   | 54.8    | 59.1    | 63.9      | 61.4   | 56.8   | 43.8 | 54.2 | 61.9      | 98.4  | 62.2    |
| Masked            | 46.5   | 33.4    | 39.7    | 43.8      | 39.7   | 33.2   | 26.7 | 35.0 | 44.8      | 99.5  | 44.2    |
| SIM               | 53.0   | 38.3    | 44.6    | 48.2      | 42.2   | 40.4   | 29.9 | 39.9 | 49.5      | 99.2  | 48.5    |
| S <sup>2</sup> IM | 83.4   | 75.6    | 80.1    | 83.9      | 77.9   | 79.2   | 67.8 | 80.8 | 85.7      | 99.1  | 81.4    |
| TIM               | 58.7   | 46.9    | 58.0    | 58.9      | 48.1   | 46.2   | 33.5 | 45.0 | 51.7      | 99.0  | 54.6    |
| ATTA              | 38.3   | 28.1    | 32.1    | 34.6      | 34.6   | 28.2   | 20.3 | 28.2 | 34.9      | 92.0  | 37.1    |
| AutoMA            | 81.9   | 78.2    | 83.3    | 84.5      | 76.0   | 78.0   | 65.7 | 86.9 | 89.0      | 98.7  | 82.2    |
| AITL              | 87.8   | 84.0    | 89.8    | 90.9      | 86.9   | 88.5   | 72.0 | 89.4 | 90.5      | 97.1  | 87.7    |
| L2T (Ours)        | 94.4   | 91.9    | 94.2    | 95.9      | 90.7   | 93.1   | 85.9 | 94.5 | 96.3      | 99.6  | 93.6    |

Table 12. Attack success rate(%) on adversarial examples on ensemble attack across four defense methods and four vision API.

| Attack            | AT   | HGD  | NRP  | RS   | Google | Azure | GPT-4V | Bard |
|-------------------|------|------|------|------|--------|-------|--------|------|
| SIM               | 36.3 | 83.8 | 65.7 | 26.4 | 77.5   | 69.8  | 62.4   | 79.7 |
| TIM               | 36.6 | 63.8 | 56.0 | 35.7 | 55.3   | 52.6  | 64.1   | 71.4 |
| Admix             | 37.8 | 91.1 | 70.8 | 29.4 | 73.6   | 57.1  | 76.0   | 83.2 |
| DEM               | 40.3 | 88.9 | 74.9 | 37.8 | 76.4   | 69.3  | 83.3   | 91.3 |
| AutoMA            | 37.9 | 89.1 | 66.5 | 30.0 | 67.4   | 61.9  | 71.4   | 86.2 |
| IDE               | 40.9 | 73.1 | 68.0 | 38.0 | 71.0   | 64.8  | 57.1   | 73.1 |
| ATTA              | 30.3 | 49.9 | 47.8 | 18.4 | 49.0   | 47.9  | 39.4   | 75.9 |
| Masked            | 32.6 | 72.9 | 49.6 | 21.1 | 57.3   | 52.7  | 72.0   | 84.3 |
| AITL              | 44.3 | 91.1 | 79.9 | 42.1 | 79.4   | 65.2  | 79.6   | 90.2 |
| S <sup>2</sup> IM | 41.1 | 90.6 | 80.1 | 37.0 | 67.0   | 65.1  | 86.2   | 93.6 |
| BSR               | 38.7 | 92.6 | 63.4 | 29.7 | 74.4   | 55.8  | 82.5   | 95.1 |
| SIA               | 37.6 | 91.5 | 63.1 | 28.9 | 77.5   | 69.1  | 89.6   | 94.2 |
| L2T (Ours)        | 47.9 | 98.5 | 87.2 | 46.7 | 86.5   | 82.7  | 96.7   | 99.9 |

Table 13. Attack success rate(%) on adversarial examples crafts on ResNet-18 by different iterations.

| Iteration | SIM  | TIM  | Admix | DEM  | AutoMA | IDE  | ATTA | Masked | AITL | S <sup>2</sup> IM | BSR  | SIA  | L2T(Ours) |
|-----------|------|------|-------|------|--------|------|------|--------|------|-------------------|------|------|-----------|
| 1         | 9.1  | 12.5 | 7.9   | 60.3 | 8.5    | 7.3  | 7.7  | 9.3    | 7.7  | 6.6               | 8.5  | 7.4  | 8.4       |
| 2         | 19.7 | 20.2 | 19.2  | 71.6 | 22.9   | 13.1 | 13.2 | 20.8   | 18.7 | 13.6              | 25.5 | 19.3 | 23.5      |
| 3         | 25.2 | 24.4 | 26.2  | 74.2 | 31.5   | 17.1 | 16.0 | 24.8   | 26.9 | 19.9              | 35.4 | 28.7 | 34.1      |
| 4         | 35.9 | 29.8 | 38.1  | 76.0 | 45.5   | 24.0 | 21.3 | 33.0   | 41.8 | 33.2              | 51.1 | 44.0 | 51.3      |
| 5         | 42.0 | 33.5 | 45.4  | 76.3 | 53.4   | 29.1 | 24.8 | 37.9   | 50.6 | 41.4              | 59.7 | 52.9 | 60.9      |
| 6         | 48.8 | 37.7 | 53.3  | 77.6 | 61.0   | 35.3 | 28.6 | 43.0   | 59.0 | 50.8              | 68.1 | 62.4 | 70.8      |
| 7         | 55.5 | 41.9 | 60.4  | 77.7 | 67.7   | 41.0 | 32.5 | 48.0   | 66.8 | 59.7              | 74.5 | 70.2 | 79.1      |
| 8         | 58.3 | 44.1 | 64.2  | 78.3 | 71.7   | 44.4 | 35.3 | 50.3   | 71.8 | 63.8              | 77.3 | 74.1 | 83.1      |
| 9         | 63.1 | 47.3 | 68.9  | 79.0 | 75.9   | 50.2 | 38.7 | 54.7   | 77.8 | 70.1              | 81.9 | 79.4 | 87.3      |
| 10        | 66.1 | 49.3 | 71.5  | 79.0 | 78.6   | 53.7 | 40.9 | 57.0   | 81.0 | 73.4              | 83.9 | 82.9 | 89.4      |
| 20        | 67.2 | 50.1 | 72.0  | 81.3 | 78.8   | 57.9 | 44.7 | 57.2   | 81.3 | 72.6              | 83.0 | 84.3 | 91.4      |
| 30        | 67.0 | 50.9 | 71.6  | 82.2 | 79.1   | 57.6 | 44.6 | 56.4   | 81.5 | 71.2              | 82.2 | 83.7 | 91.5      |
| 40        | 67.4 | 51.2 | 71.6  | 82.8 | 79.4   | 58.6 | 45.1 | 55.8   | 81.4 | 71.4              | 83.0 | 84.1 | 91.8      |
| 50        | 67.5 | 51.6 | 71.9  | 82.7 | 80.1   | 59.2 | 45.3 | 56.2   | 83.2 | 70.7              | 83.5 | 84.4 | 92.3      |
| 60        | 67.4 | 51.9 | 71.6  | 83.0 | 80.5   | 59.8 | 45.4 | 56.5   | 81.1 | 71.0              | 84.0 | 85.5 | 92.6      |
| 70        | 67.3 | 52.1 | 71.9  | 82.8 | 81.0   | 60.2 | 45.1 | 56.3   | 81.6 | 70.6              | 83.8 | 85.7 | 92.8      |
| 80        | 67.5 | 51.9 | 71.9  | 83.2 | 80.9   | 60.3 | 45.5 | 56.3   | 82.8 | 70.1              | 84.0 | 85.7 | 93.0      |
| 90        | 67.6 | 51.8 | 71.6  | 83.1 | 81.3   | 60.7 | 45.4 | 56.1   | 83.7 | 70.2              | 83.9 | 85.4 | 93.8      |
| 100       | 67.3 | 51.8 | 71.3  | 83.3 | 81.1   | 60.8 | 45.5 | 55.8   | 82.9 | 70.0              | 84.1 | 85.7 | 94.7      |

Table 14. Attack success rate (%) across ten models on adversarial examples crafted on ResNet-18 by different operation number

| Operation Number | Res-18 | Res-101 | NeXT-50 | Denset-121 | Inc-v3 | Inc-v4 | ViT  | PiT  | Visformer | Swin | Average |
|------------------|--------|---------|---------|------------|--------|--------|------|------|-----------|------|---------|
| 1                | 100.0  | 96.7    | 96.9    | 98.3       | 90.7   | 89.9   | 46.6 | 56.5 | 74.6      | 76.1 | 82.6    |
| 2                | 100.0  | 99.3    | 99.2    | 99.6       | 96.9   | 97.4   | 63.7 | 71.1 | 86.6      | 86.0 | 90.0    |
| 3                | 100.0  | 99.4    | 99.5    | 99.6       | 98.2   | 98.6   | 63.2 | 76.0 | 89.1      | 89.5 | 91.2    |
| 4                | 100.0  | 99.6    | 99.6    | 99.8       | 98.5   | 99.4   | 64.1 | 77.1 | 90.1      | 90.0 | 91.8    |
| 5                | 100.0  | 99.6    | 99.7    | 99.8       | 98.6   | 99.5   | 64.9 | 77.8 | 90.5      | 90.3 | 92.0    |



Table 15. Attack success rate (%) across ten models on adversarial examples generated on Res-18 by different number of samples.

| Sample Number | Res-18 | Res-101 | NeXt-50 | Dense-121 | Inc-v3 | Inc-v4 | ViT  | PiT  | Visformer | Swin | Average |
|---------------|--------|---------|---------|-----------|--------|--------|------|------|-----------|------|---------|
| 1             | 100.0  | 90.6    | 92.3    | 95.3      | 85.5   | 82.5   | 38.9 | 46.4 | 61.0      | 64.9 | 75.7    |
| 2             | 100.0  | 95.4    | 95.7    | 98.0      | 91.3   | 90.0   | 47.9 | 55.9 | 72.7      | 74.1 | 82.1    |
| 3             | 100.0  | 96.7    | 97.1    | 98.6      | 93.1   | 93.4   | 51.6 | 59.4 | 78.6      | 77.7 | 84.6    |
| 4             | 100.0  | 97.3    | 98.3    | 98.9      | 94.4   | 94.0   | 55.3 | 62.7 | 79.0      | 80.7 | 86.1    |
| 5             | 100.0  | 98.3    | 98.3    | 99.4      | 95.4   | 95.1   | 57.4 | 65.7 | 82.6      | 83.1 | 87.5    |
| 6             | 100.0  | 99.1    | 98.7    | 99.6      | 96.0   | 96.5   | 59.3 | 67.2 | 83.1      | 82.2 | 88.2    |
| 7             | 100.0  | 99.3    | 98.4    | 99.6      | 96.1   | 96.3   | 61.2 | 67.9 | 85.0      | 83.5 | 88.7    |
| 8             | 100.0  | 99.1    | 98.9    | 99.6      | 97.2   | 96.0   | 59.5 | 68.9 | 84.4      | 85.1 | 88.9    |
| 9             | 100.0  | 99.2    | 99.2    | 99.5      | 97.0   | 96.4   | 62.3 | 70.5 | 86.3      | 86.3 | 89.7    |
| 10            | 100.0  | 99.3    | 99.2    | 99.6      | 96.9   | 97.4   | 63.7 | 71.1 | 86.6      | 86.0 | 90.0    |
| 11            | 100.0  | 99.2    | 99.0    | 99.7      | 96.5   | 97.2   | 64.7 | 72.7 | 87.1      | 86.5 | 90.3    |
| 12            | 100.0  | 99.1    | 98.8    | 99.8      | 96.7   | 96.6   | 63.8 | 72.7 | 86.6      | 86.0 | 90.0    |
| 13            | 100.0  | 99.3    | 99.0    | 99.7      | 96.0   | 97.5   | 65.4 | 72.1 | 87.6      | 86.7 | 90.3    |
| 14            | 100.0  | 99.4    | 99.4    | 99.6      | 96.9   | 97.2   | 65.4 | 73.8 | 88.5      | 89.2 | 90.9    |
| 15            | 100.0  | 99.2    | 99.5    | 99.6      | 97.3   | 97.5   | 65.4 | 73.0 | 88.1      | 86.8 | 90.6    |
| 16            | 100.0  | 99.3    | 99.4    | 99.7      | 97.4   | 97.6   | 67.2 | 74.7 | 88.6      | 87.8 | 91.2    |
| 17            | 100.0  | 99.4    | 99.3    | 99.7      | 97.9   | 98.1   | 66.4 | 73.0 | 89.1      | 87.9 | 91.1    |
| 18            | 100.0  | 99.2    | 99.3    | 99.5      | 97.2   | 97.3   | 66.7 | 74.5 | 89.3      | 88.1 | 91.0    |
| 19            | 100.0  | 99.3    | 99.2    | 99.6      | 97.4   | 97.9   | 66.1 | 73.9 | 88.4      | 87.9 | 91.1    |
| 20            | 100.0  | 99.3    | 99.6    | 99.7      | 96.6   | 97.5   | 66.4 | 74.2 | 88.8      | 89.3 | 91.1    |
| 21            | 100.0  | 99.4    | 99.4    | 99.5      | 97.0   | 98.2   | 66.1 | 75.0 | 89.0      | 87.8 | 91.1    |
| 22            | 100.0  | 99.3    | 99.6    | 99.7      | 97.0   | 97.8   | 67.8 | 75.0 | 89.3      | 88.8 | 91.4    |
| 23            | 100.0  | 99.4    | 99.3    | 99.6      | 97.0   | 98.0   | 68.3 | 74.2 | 89.6      | 88.9 | 91.4    |
| 24            | 100.0  | 99.5    | 99.4    | 99.7      | 97.6   | 97.9   | 67.4 | 75.4 | 89.6      | 89.7 | 91.6    |
| 25            | 100.0  | 99.3    | 99.5    | 99.5      | 97.4   | 98.1   | 67.3 | 75.1 | 88.8      | 88.4 | 91.3    |
| 26            | 100.0  | 99.3    | 99.4    | 99.6      | 97.3   | 98.5   | 68.1 | 76.1 | 89.6      | 88.9 | 91.7    |
| 27            | 100.0  | 99.4    | 99.4    | 99.8      | 97.6   | 97.7   | 67.7 | 76.3 | 90.0      | 89.7 | 91.8    |
| 28            | 100.0  | 99.3    | 99.2    | 99.8      | 97.6   | 98.0   | 68.4 | 76.8 | 90.3      | 89.6 | 91.9    |
| 29            | 100.0  | 99.3    | 99.4    | 99.6      | 97.5   | 98.4   | 67.8 | 75.5 | 89.5      | 89.8 | 91.7    |
| 30            | 100.0  | 99.4    | 99.6    | 99.6      | 97.6   | 98.4   | 68.3 | 76.1 | 90.3      | 88.7 | 91.8    |
| 31            | 100.0  | 99.5    | 99.5    | 99.6      | 97.5   | 98.4   | 68.2 | 76.2 | 89.7      | 90.4 | 91.9    |
| 32            | 100.0  | 99.5    | 99.5    | 99.5      | 98.0   | 98.4   | 68.6 | 75.9 | 90.2      | 89.5 | 91.9    |
| 33            | 100.0  | 99.3    | 99.5    | 99.7      | 97.6   | 98.4   | 68.0 | 76.6 | 90.2      | 90.1 | 91.9    |
| 34            | 100.0  | 99.5    | 99.5    | 99.8      | 97.9   | 98.2   | 69.3 | 76.7 | 90.4      | 90.2 | 92.2    |
| 35            | 100.0  | 99.5    | 99.4    | 99.8      | 98.0   | 98.8   | 69.9 | 76.6 | 90.3      | 90.2 | 92.2    |
| 36            | 100.0  | 99.4    | 99.6    | 99.8      | 97.7   | 98.2   | 70.1 | 76.9 | 90.0      | 90.1 | 92.2    |
| 37            | 100.0  | 99.6    | 99.6    | 99.8      | 97.6   | 98.2   | 68.8 | 76.9 | 90.6      | 90.6 | 92.2    |
| 38            | 100.0  | 99.4    | 99.5    | 99.8      | 97.6   | 98.3   | 69.5 | 76.0 | 91.3      | 89.8 | 92.1    |
| 39            | 100.0  | 99.4    | 99.4    | 99.5      | 97.3   | 98.1   | 70.5 | 77.8 | 90.6      | 90.2 | 92.3    |
| 40            | 100.0  | 99.3    | 99.6    | 99.8      | 97.9   | 98.6   | 67.7 | 76.1 | 90.4      | 90.0 | 91.9    |
| 41            | 100.0  | 99.5    | 99.6    | 99.7      | 97.6   | 98.5   | 69.0 | 77.4 | 90.4      | 90.8 | 92.2    |
| 42            | 100.0  | 99.5    | 99.6    | 99.8      | 97.6   | 98.4   | 69.7 | 76.5 | 90.7      | 90.2 | 92.2    |
| 43            | 100.0  | 99.5    | 99.3    | 99.7      | 98.0   | 98.8   | 70.1 | 77.2 | 91.3      | 89.7 | 92.4    |
| 44            | 100.0  | 99.5    | 99.6    | 99.8      | 98.2   | 98.3   | 69.5 | 76.6 | 90.3      | 89.8 | 92.2    |
| 45            | 100.0  | 99.6    | 99.6    | 99.8      | 97.7   | 98.4   | 69.7 | 77.2 | 90.6      | 90.4 | 92.3    |
| 46            | 100.0  | 99.5    | 99.7    | 99.8      | 97.7   | 98.5   | 69.6 | 77.1 | 91.6      | 90.4 | 92.4    |
| 47            | 100.0  | 99.7    | 99.8    | 99.8      | 97.9   | 98.9   | 69.9 | 77.0 | 91.4      | 90.9 | 92.5    |
| 48            | 100.0  | 99.5    | 99.5    | 99.7      | 97.6   | 98.4   | 69.5 | 76.9 | 90.9      | 91.3 | 92.3    |
| 49            | 100.0  | 99.6    | 99.6    | 99.8      | 97.8   | 98.7   | 69.9 | 76.9 | 91.3      | 90.8 | 92.2    |
| 50            | 100.0  | 99.5    | 99.5    | 99.8      | 98.2   | 98.6   | 69.7 | 77.4 | 91.5      | 91.4 | 92.6    |

 You

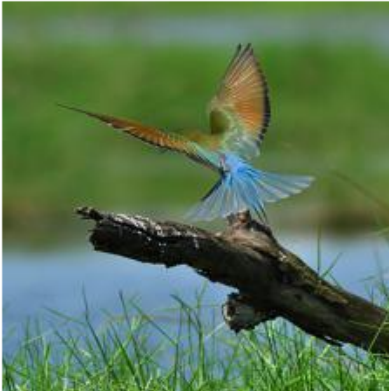

What kind of thing is in the picture?

 ChatGPT

The image shows a bird, specifically a kingfisher, in flight as it takes off from a branch. The bird is captured in a moment that beautifully displays its colorful plumage, with wings outstretched and tail feathers spread, which is characteristic of the agility and speed these birds possess, especially when darting out to catch their prey in the water.

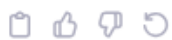

Figure 11. The conversation with ChatGPT for the benign example

You

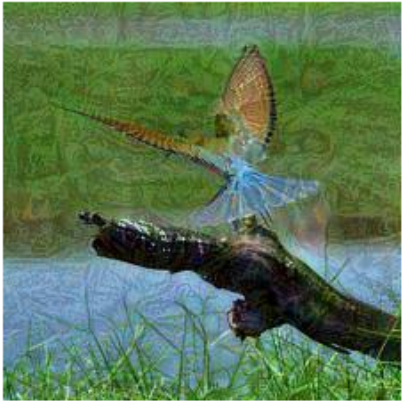

What kind of thing is in the picture?

ChatGPT

The image you've uploaded appears to depict a dragonfly perched on a branch. The image has an artistic, almost painterly quality, with textures that give it a unique look, blending the insect into its background. Dragonflies are known for their elongated bodies, two pairs of strong, transparent wings, and large, multifaceted eyes, all of which are characteristics visible in this representation.

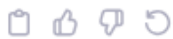

Figure 12. The conversation with ChatGPT for the adversarial example

What kind of thing is in the picture?

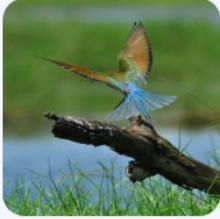

The bird in the image is a hummingbird. Hummingbirds are small, brightly colored birds that are known for their ability to hover in midair and feed on nectar from flowers. They are also the only birds that can fly backwards.

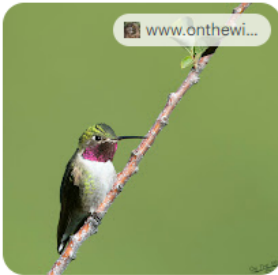

Hummingbird landing on a branch ...

More specifically, this image might show one of the following (in decreasing order of confidence):

- European bee-eater
- Blue-tailed bee-eater
- Bee-eater
- Rollers

This is because all of these birds are similar in appearance to hummingbirds, with long, slender beaks and brightly colored feathers. However, there are a few key differences that can help to distinguish between them. For example, hummingbirds have a unique flying style in which they flap their wings very quickly, while bee-eaters and rollers tend to flap their wings more slowly. Additionally, hummingbirds are typically smaller than bee-eaters and rollers.

It is difficult to say definitively which species of bird is depicted in the image without more information, such as the location where the photo was taken. However, given the physical characteristics of the bird, as well as the fact that the photo was taken near a body of water, it is most likely a hummingbird.

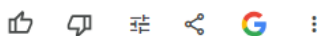

Figure 13. The conversation with Bard for the benign example

What kind of thing is in the picture?

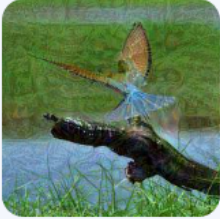

The image you sent is a photo of a crocodile sitting on a branch next to a body of water. It is difficult to determine the exact species of crocodile from the photo, but it is likely a Nile crocodile or a saltwater crocodile.

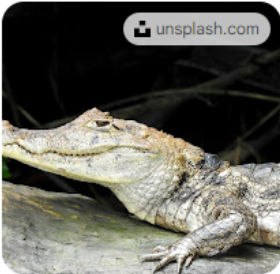

Crocodile sitting on a branch

Crocodiles are apex predators in their ecosystems and are known for their ambush hunting techniques. They wait patiently in the water for prey to come close, then launch themselves out of the water and attack with a powerful bite. Crocodiles are also known for their strong jaws and teeth, which can easily crush bone.

Crocodiles are found in tropical and subtropical regions around the world. They are typically found in freshwater habitats, such as rivers, lakes, and swamps, but they can also be found in saltwater habitats, such as mangrove forests and estuaries.

Crocodiles are an important part of the ecosystems they inhabit, and they play a role in controlling populations of prey animals. However, crocodiles can also be dangerous to humans, and it is important to be aware of their presence when in their habitat.

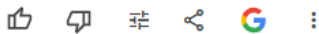

Figure 14. The conversation with Bard for the adversarial example
